# Supplementary material for: MATR3 is an endogenous inhibitor of DUX4 in FSHD muscular dystrophy
Source: PubMed Central journal article supplement — Cell Rep. Author manuscript; Available in PMC 2023 Oct 23. (PMC10591880; doi:10.1016/j.celrep.2023.113120), 2023-09-12
Supplement: NIHMS1933917-supplement-1.pdf [file NIHMS1933917-supplement-1.pdf]

**Cell Reports, Volume 42**

**Supplemental information**

**MATR3 is an endogenous inhibitor  
of DUX4 in FSHD muscular dystrophy**

**Valeria Runfola, Roberto Giambruno, Claudia Caronni, Maria Pannese, Annapaola Andolfo, and Davide Gabellini**

**A**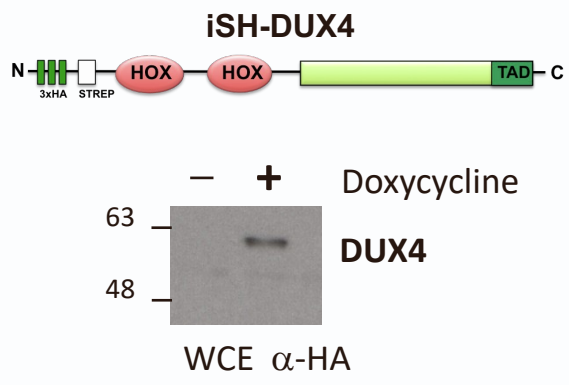**B**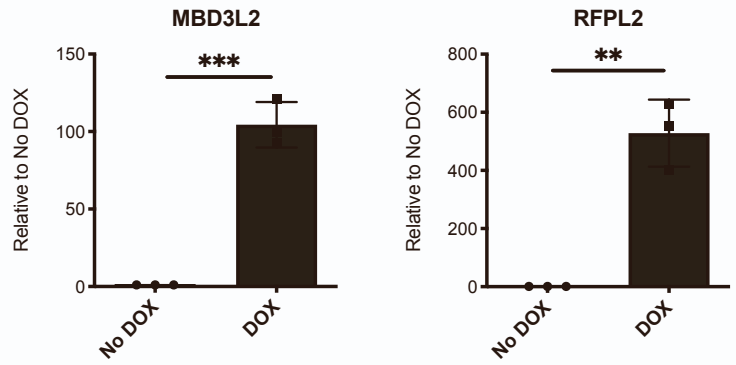**C**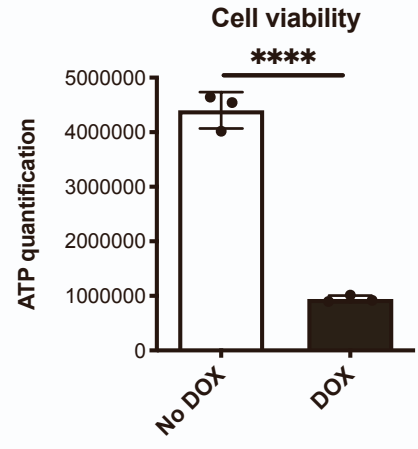**D**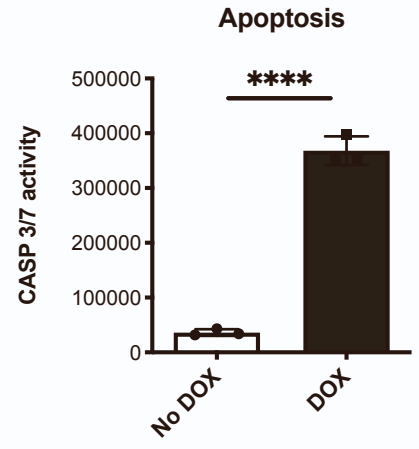

**Fig. S1. Characterization of iSH-DUX4 HEK293 cells.** (Related to Figure 1). **A.** Top: scheme of the inducible DUX4 protein expressed by iSH-DUX4 HEK293 cells, with 3x HA and 1x STREP N-terminal tags, fused to *DUX4* ORF, composed of 2 homeoboxes (HOX) at the N-terminus and a transactivation domain (TAD) at the C-terminus. Bottom: Immunoblotting with anti-HA antibody performed on whole-cell extracts (WCE) from iSH-DUX4 cells after 4 h of doxycycline administration. **B.** RT-qPCR showing the expression of the indicated DUX4 target genes, performed in HEK293 iSH-DUX4 cells, after 8 h of doxycycline administration. Values are expressed relative to non-induced cells (No DOX) (unpaired Student's t test, \*\* $p < 0.01$ ; \*\*\* $p < 0.001$ ,  $n=3$ ). **C.** Cell viability assay performed in HEK293 iSH-DUX4 cells after 24 h of doxycycline administration (unpaired Student's t test, \*\*\*\* $p < 0.0001$ ,  $n=3$ ). **D.** Caspase 3/7 activity assay performed in HEK293 iSH-DUX4 cells after 24 h of doxycycline administration (unpaired Student's t test, \*\*\*\* $p < 0.0001$ ,  $n=3$ ).

**A**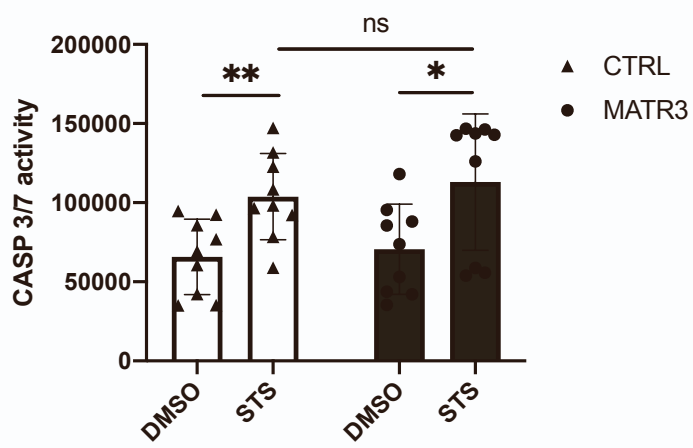**B**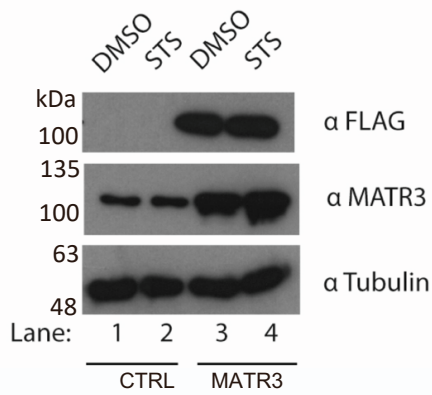

**Fig. S2. MATR3 does not protect from Staurosporine-induced apoptosis.** (Related to Figure 1). **A.**

Caspase 3/7 activity assay performed in HEK293 cells transfected with empty vector (CTRL) or MATR3, and treated 24 h post-transfection with Staurosporine or DMSO (as negative control) for 6 h (unpaired Student's t test, \* $p < 0.05$ , \*\* $p < 0.01$ ,  $n = 9$ ).

**B.** Immunoblotting with anti-FLAG (recognizing transfected MATR3), anti-MATR3 (recognizing endogenous as well as transfected MATR3) and anti-tubulin (as loading control) on total proteins extracts from HEK293 cells transfected with empty vector (CTRL, lanes 1 and 2) or MATR3 (lanes 3 and 4) and treated with DMSO (lanes 1 and 3) or Staurosporine (lanes 2 and 4).

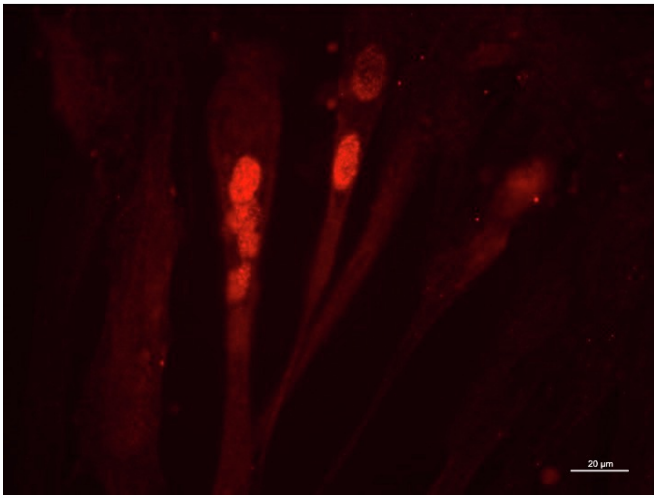

$\alpha$ -DUX4

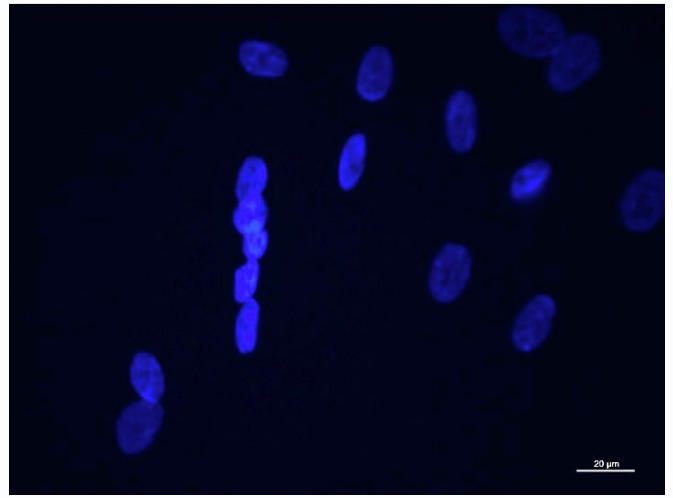

Hoechst

**Fig. S3. Endogenous DUX4 is expressed only in a fraction of FSHD myonuclei.** (Related to Figure 2). Representative immunofluorescence of DUX4 (red, left) performed with anti-DUX4 E5-5 antibody in differentiated primary FSHD muscle cells. Hoechst 33342 was used to stain nuclei (blue, right). Scalebar: 20  $\mu$ m

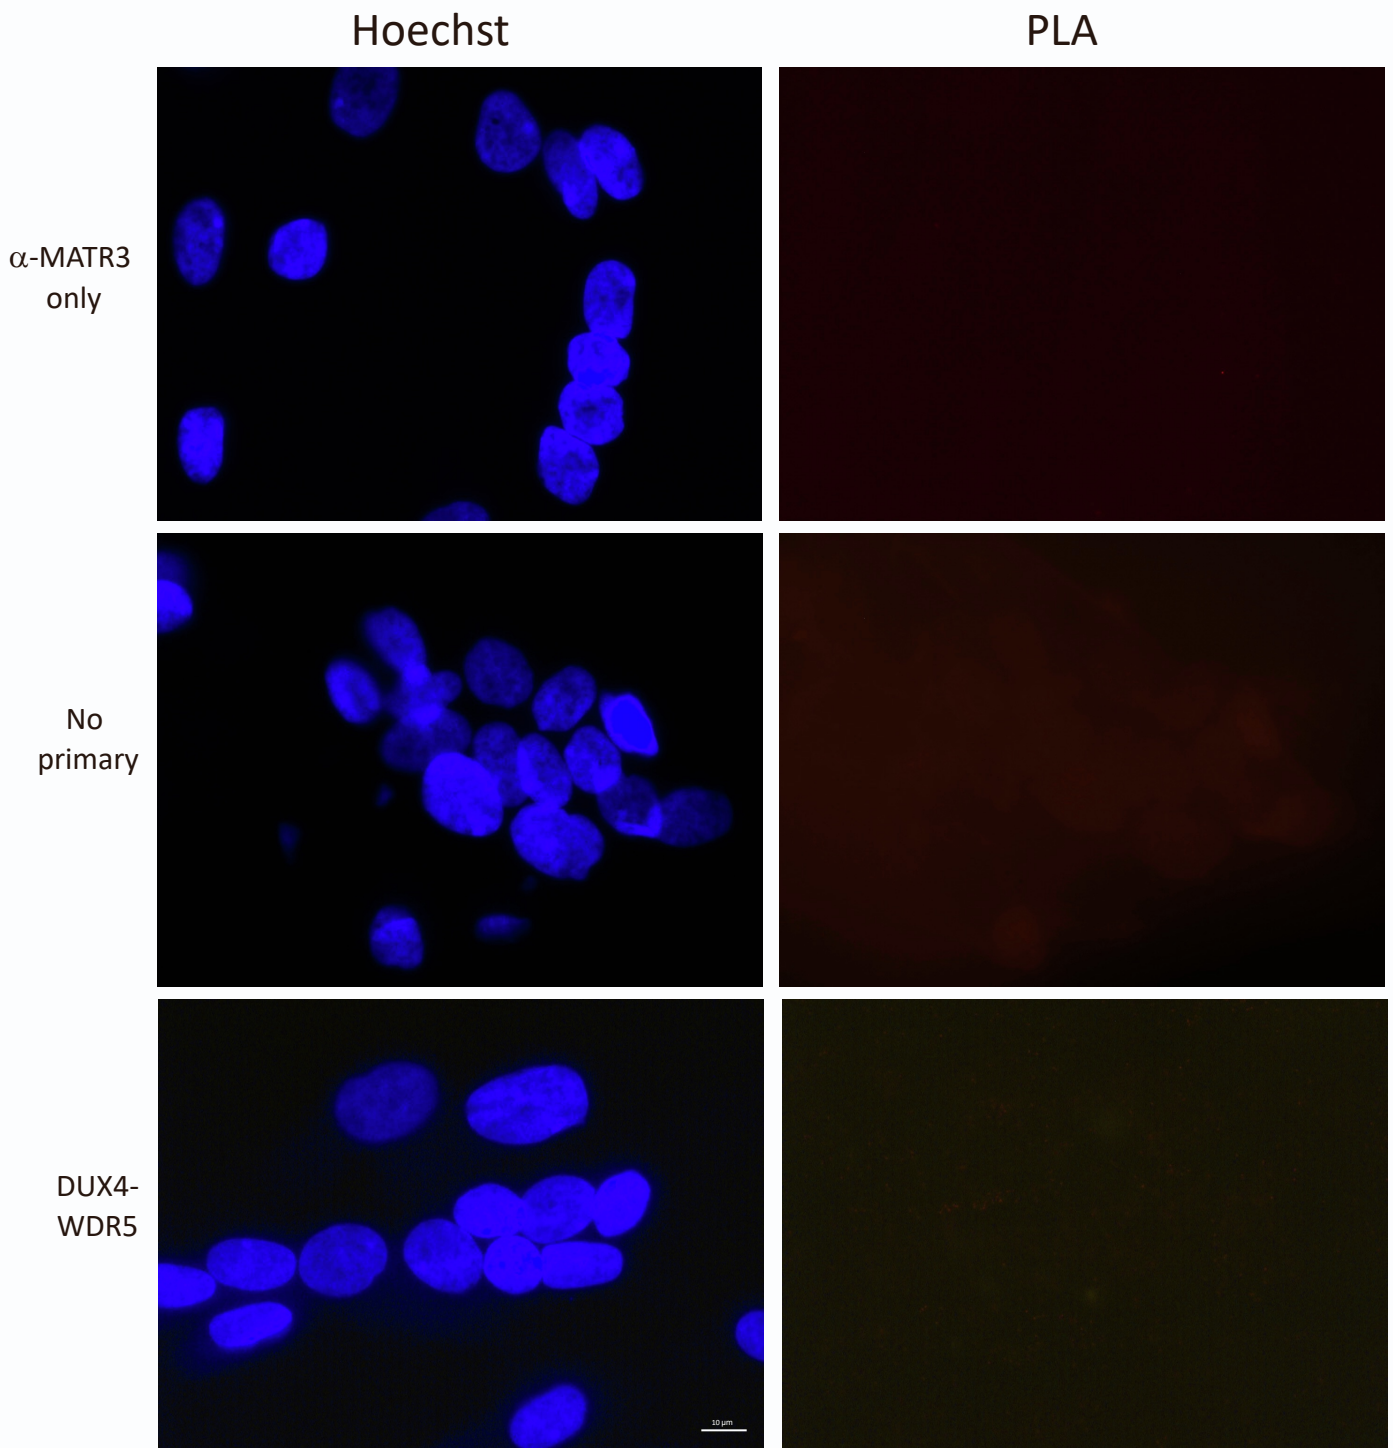

**Fig. S4. PLA signal is specific for the DUX4-MATR3 interaction.** (Related to Figure 2). Representative pictures of proximity ligation assay (PLA) performed in terminally differentiated primary FSHD muscle cells with only one primary antibody (anti-MATR3, top), without any primary antibody (middle) or with primary antibodies against DUX4 and WDR5, a protein that does not interact with DUX4 (bottom), as negative controls, to assess the specificity of the interaction between endogenous MATR3 and DUX4 shown in Fig. 2B. DAPI was used to stain nuclei (blue, left). Scalebar: 10  $\mu$ m.

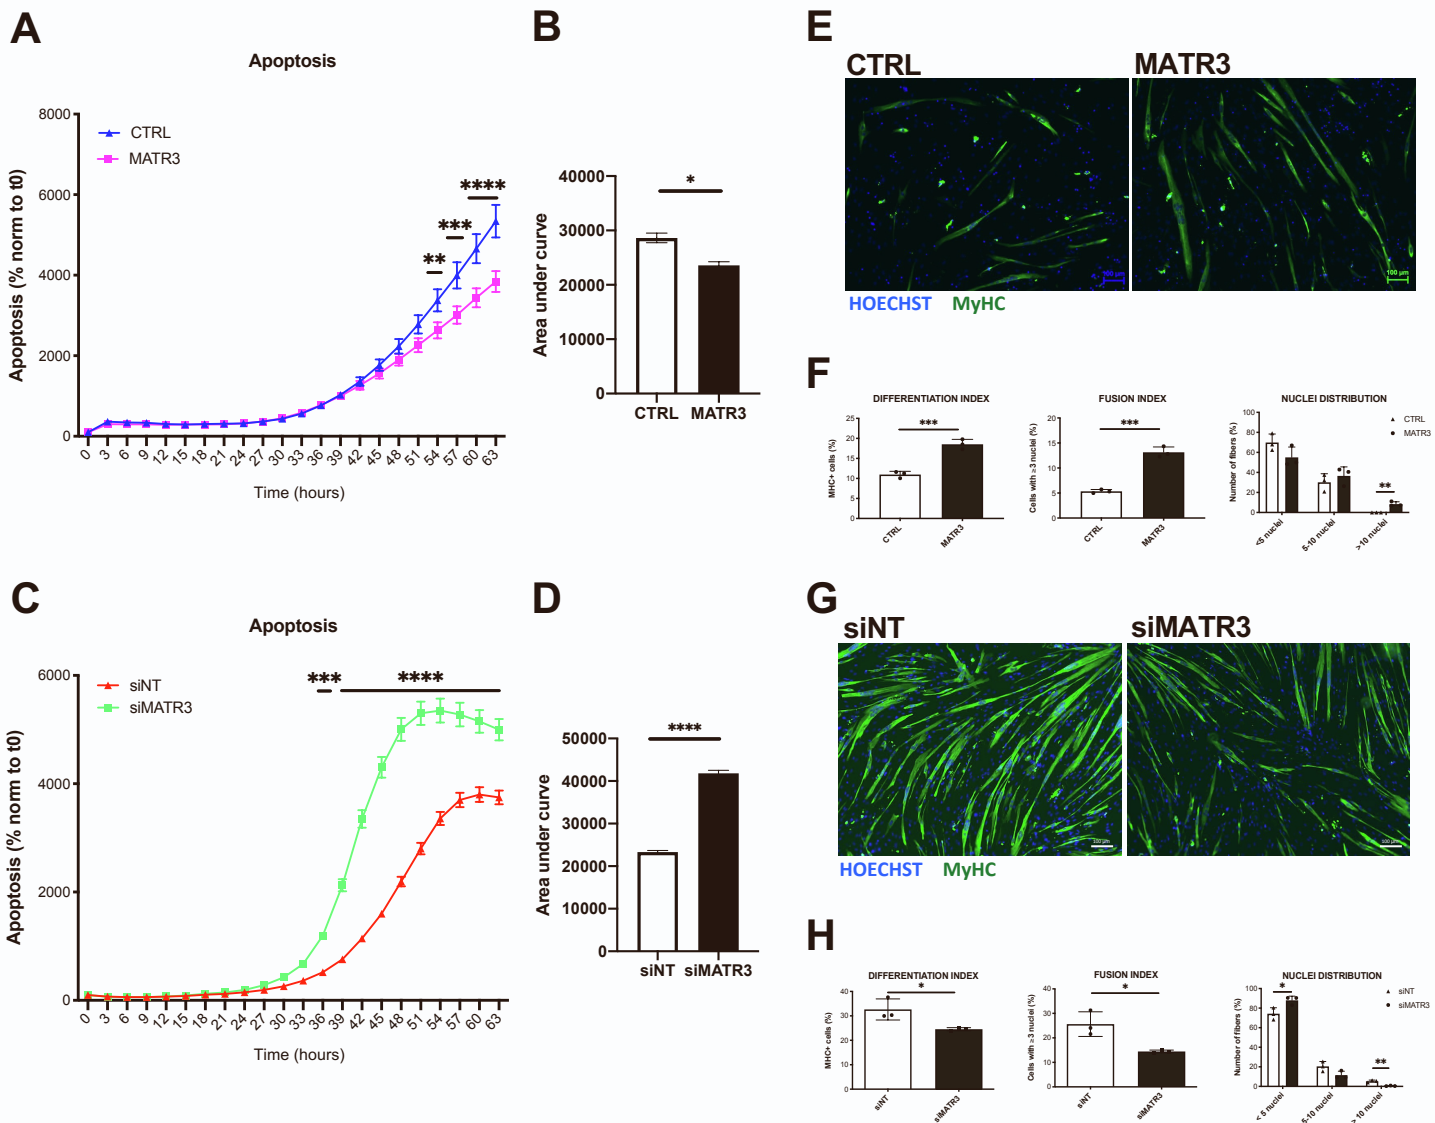

**Fig. S5. MATR3 overexpression rescues viability and myogenic differentiation of FSHD muscle cells.**

(Related to Figure 3). **A.** Apoptotic assays on primary FSHD muscle cells (from a different patient than the one used in Fig. 3A) transduced with control (CTRL) or *MATR3* lentiviruses. Data are reported as percentage (%) of green-fluorescent apoptotic cells normalized to time 0 (Two-Way ANOVA, \*\* $p < 0.01$ , \*\*\* $p < 0.001$ , \*\*\*\* $p < 0.0001$   $n = 3$ ). **B.** Quantification of the area under the curve in A (unpaired Student's t test, \* $p < 0.05$ ). **C.** Apoptotic assays on primary FSHD muscle cells (from a different patient than the one used in Fig. 3C) transfected with control (siINT) or *MATR3* (si*MATR3*) siRNAs. Acquisition, quantification and data representation like in A. (Two-Way ANOVA, \*\*\* $p < 0.001$ , \*\*\*\* $p < 0.0001$ ,  $n = 3$ ). **D.** Quantification of the area under the curve in C (unpaired Student's t test, \*\*\*\* $p < 0.0001$ ). **E.** Representative images of Myosin Heavy-chain (MyHC, green) and Nuclei (Hoechst 33342, blue) staining performed on differentiated primary FSHD muscle cells (from a different patient than the one used in Fig. 3E) transduced with control (CTRL) or *MATR3* lentiviruses. Scalebar: 100  $\mu\text{m}$ . **F.** Quantification of differentiation index, fusion index, and nuclei distribution in primary FSHD muscle cells treated as in E (unpaired Student's t test, \*\* $p < 0.01$ , \*\*\* $p \leq 0.001$ ,  $n = 3$ ). **G.** Representative images of Myosin Heavy-chain (MyHC, green) and Nuclei (Hoechst 33342, blue) staining performed on differentiated primary FSHD muscle cells (from a different patient than the one used in Fig. 3G) transfected with control (siINT) or *MATR3* (si*MATR3*) siRNAs. Scalebar: 100  $\mu\text{m}$ . **H.** Quantification of differentiation index, fusion index, and nuclei distribution in primary FSHD muscle cells treated as in G (unpaired Student's t test, \* $p < 0.05$ , \*\* $p < 0.01$ ,  $n = 3$ ).

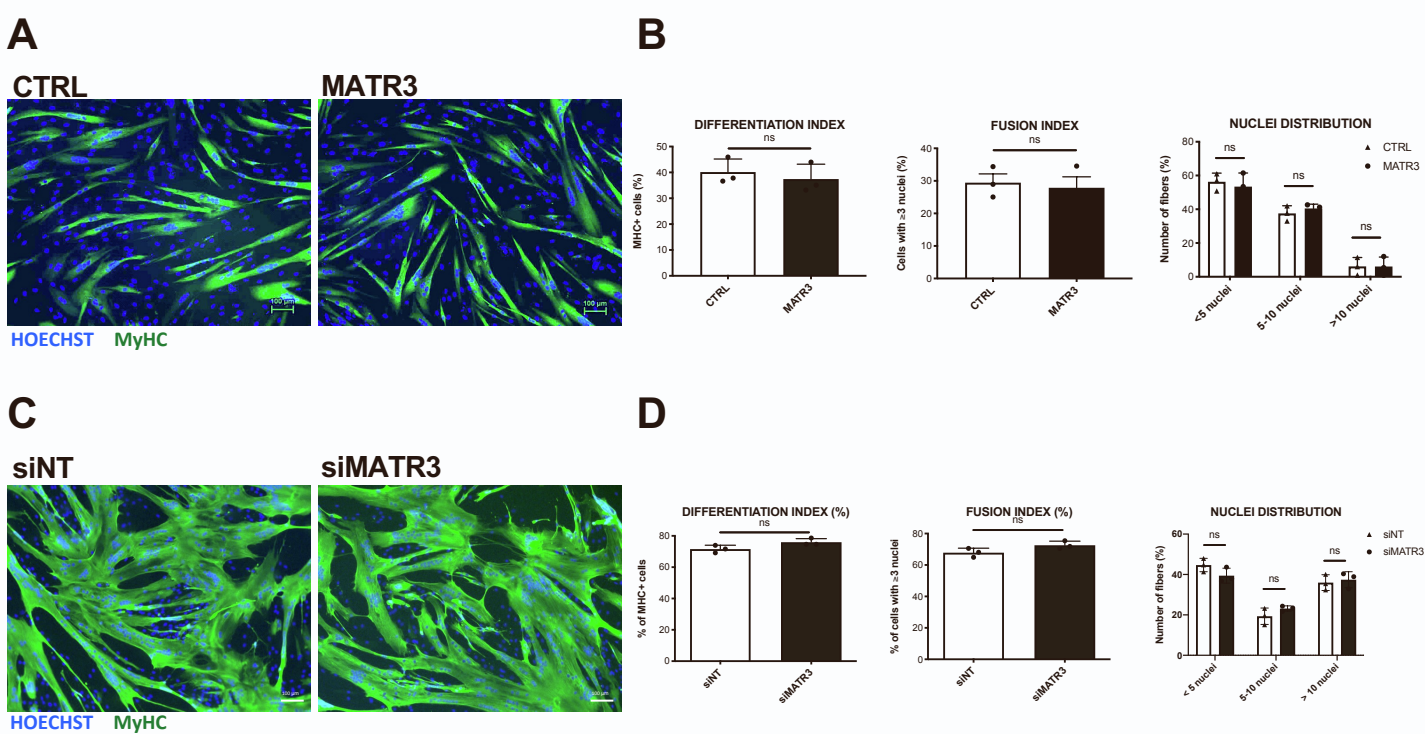

**Fig. S6. MATR3 manipulation does not affect differentiation of healthy primary muscle cells.**

(Related to Figure 3). **A.** Representative images of Myosin Heavy-chain (MyHC, green) and Nuclei (Hoechst 33342, blue) staining performed on differentiated healthy primary muscle cells transduced with control (CTRL) or *MATR3* lentiviruses. Scalebar: 100  $\mu$ m. **B.** Quantification of differentiation index, fusion index, and nuclei distribution in healthy primary muscle cells treated as in A (unpaired Student's t test, n=3). **C.** Representative images of Myosin Heavy-chain (MyHC, green) and Nuclei (Hoechst 33342, blue) staining performed on differentiated healthy primary muscle cells transfected with control (siNT) or *MATR3* (si*MATR3*) siRNAs. Scalebar: 100  $\mu$ m. **D.** Quantification of differentiation index, fusion index, and nuclei distribution in primary healthy muscle cells treated as in C (unpaired Student's t test, n=3).

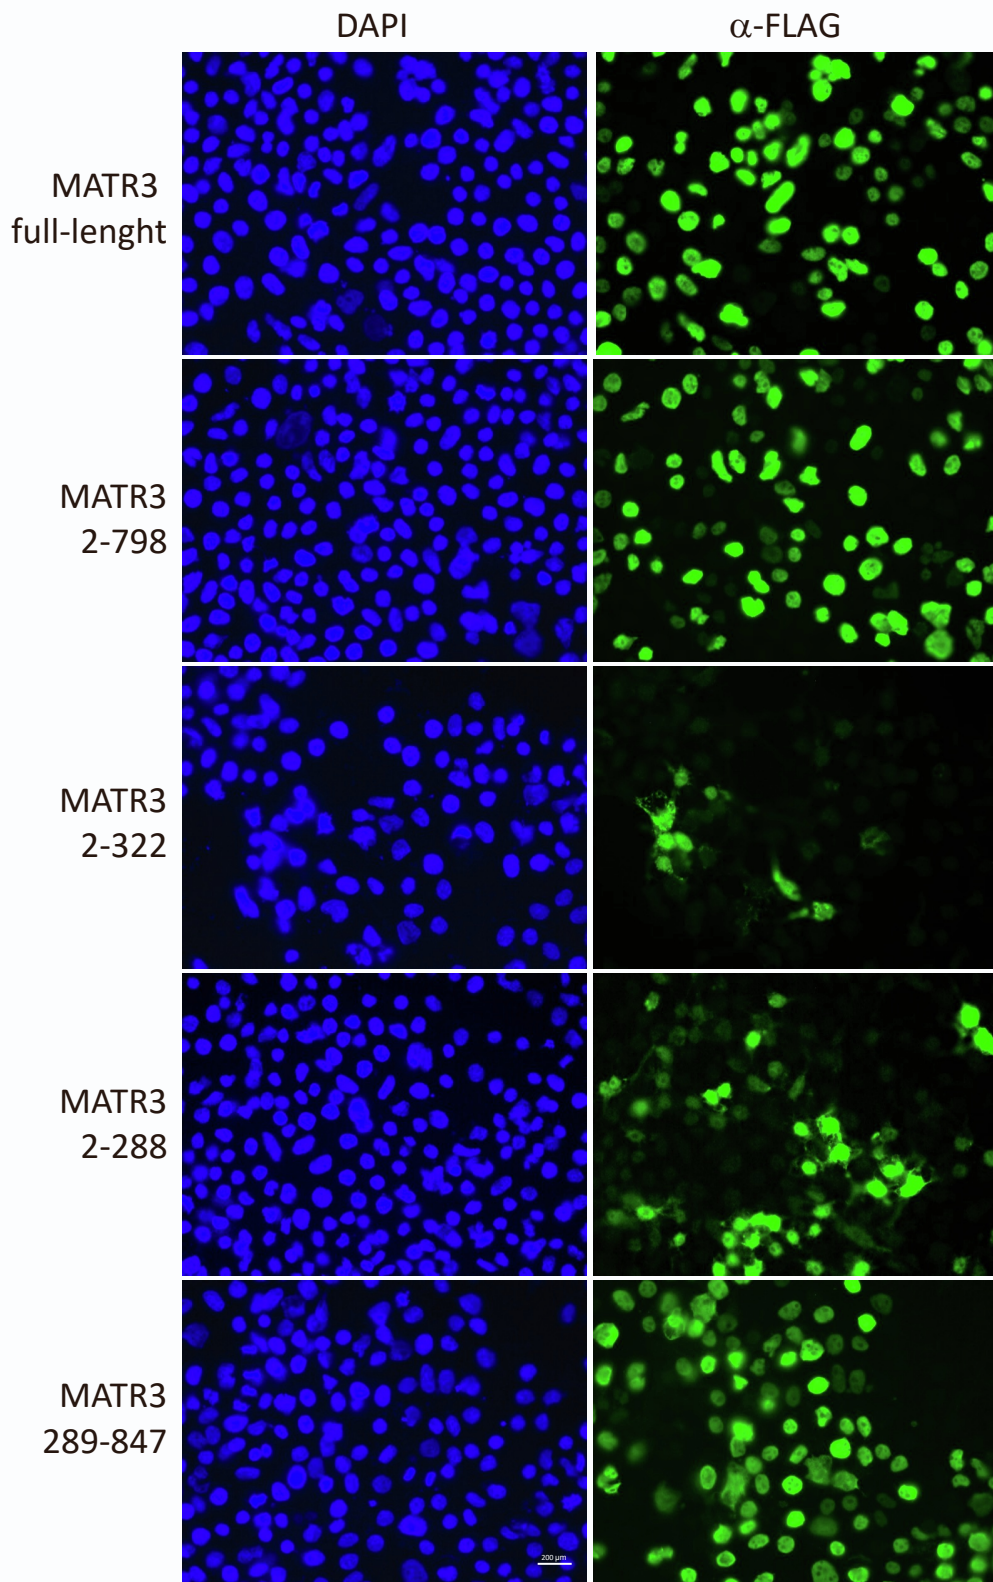

**Fig. S7. MATR3 deletion mutants maintain the nuclear localization.** (Related to Figure 4). Representative immunofluorescence of FLAG-tagged MATR3 mutants (green, right) performed with anti-FLAG antibody in HEK293 cells transfected with the MATR3 constructs indicated on the left. DAPI was used to stain nuclei (blue, left). Scalebar: 200  $\mu$ m



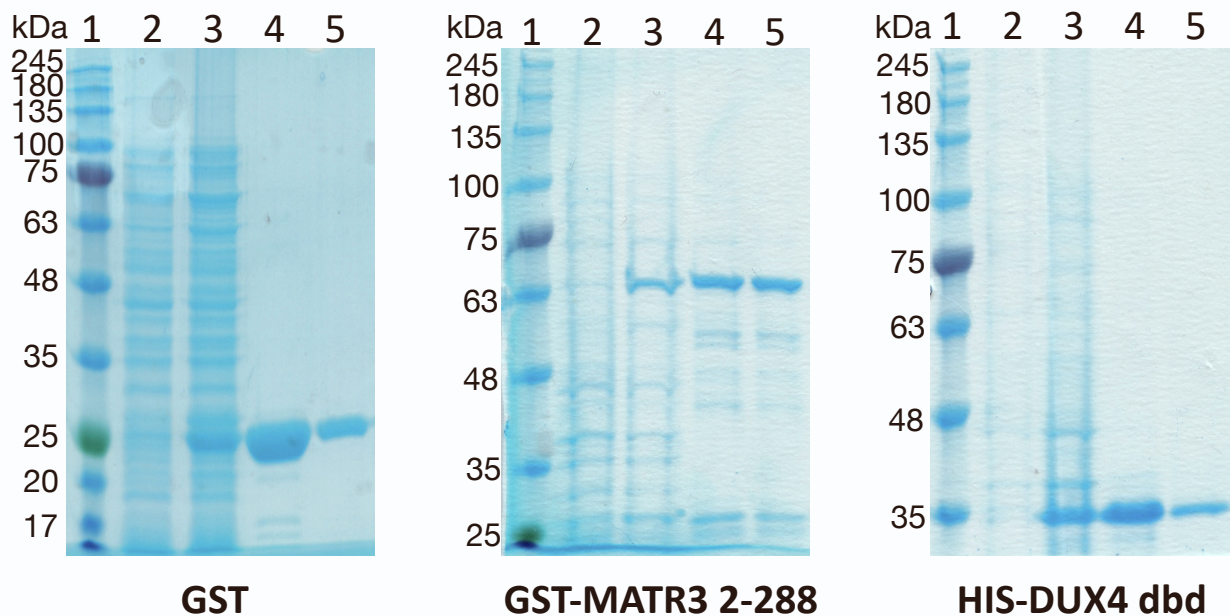

**Fig. S8. Purification of recombinant DUX4 dbd and MATR3<sub>2-288</sub>.** (Related to Figure 4). Coomassie staining showing the purification steps towards the production of recombinant GST (used as control, left), GST-fused MATR3<sub>2-288</sub> (GST-MATR3 2-288, middle) and HIS-fused DUX4 DNA-binding domain (HIS-DUX4 dbd, right). Loading order is the following: molecular weight marker (lane 1), bacteria before induction (lane 2), bacteria after induction (lane 3), protein attached to beads (lane 4), purified protein (lane 5).

**A**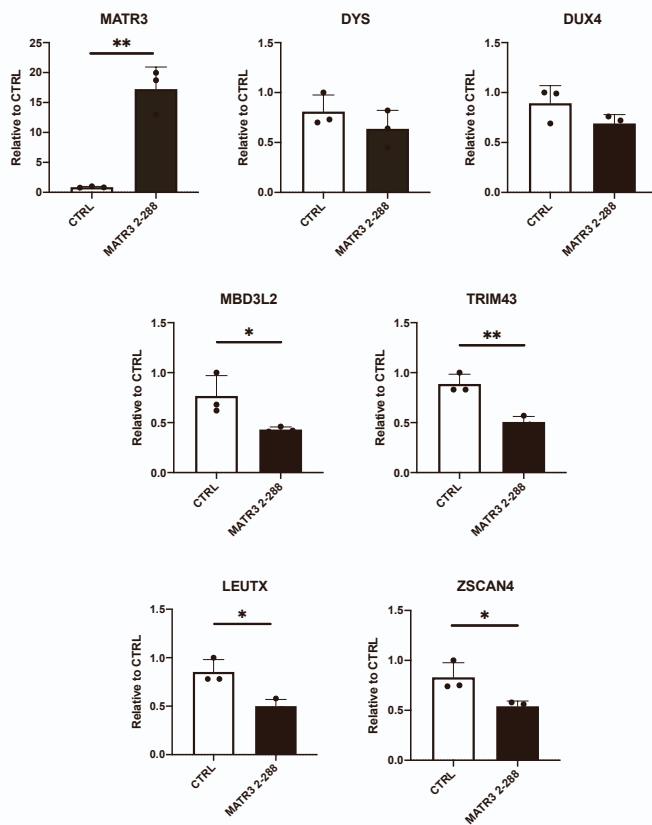**B**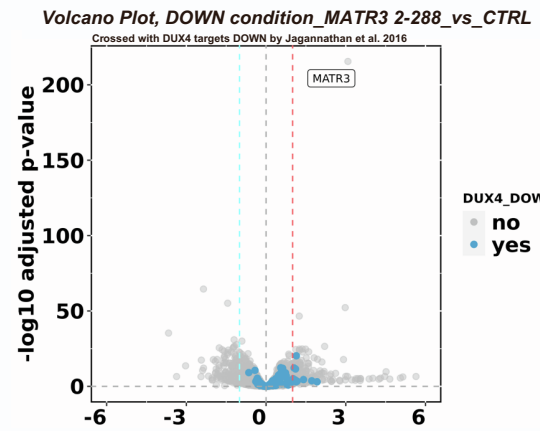**C**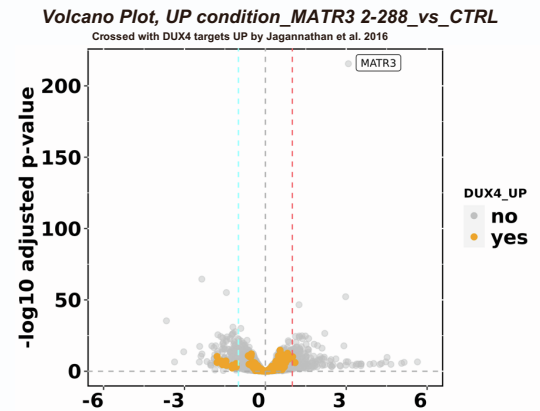

**Fig. S9. MATR3<sub>2-288</sub> blocks DUX4-dependent gene expression.** (Related to Figure 5). **A.** RT-qPCR for the indicated genes performed on RNA from differentiated FSHD primary muscle cells (from a different patient than the one used in Fig. 5A) transduced with a control (CTRL) or MATR3<sub>2-288</sub> lentiviruses. Data are represented as relative to CTRL (unpaired Student's t test, \*p<0.05, \*\*p<0.01, n=3). **B.** Volcano plot (same as Fig. 5C) showing no significantly downregulated genes by MATR3<sub>2-288</sub> overexpression among the lists of DUX4 down regulated targets from Jagannathan et al. 2016, filtered for absolute values of |log<sub>2</sub> FC| > 1. **C.** Volcano plot (same as Fig. 5B) showing no significantly upregulated genes by MATR3<sub>2-288</sub> overexpression among the lists of DUX4 upregulated targets from Jagannathan et al. 2016, filtered for absolute values of |log<sub>2</sub> FC| > 1.

**A**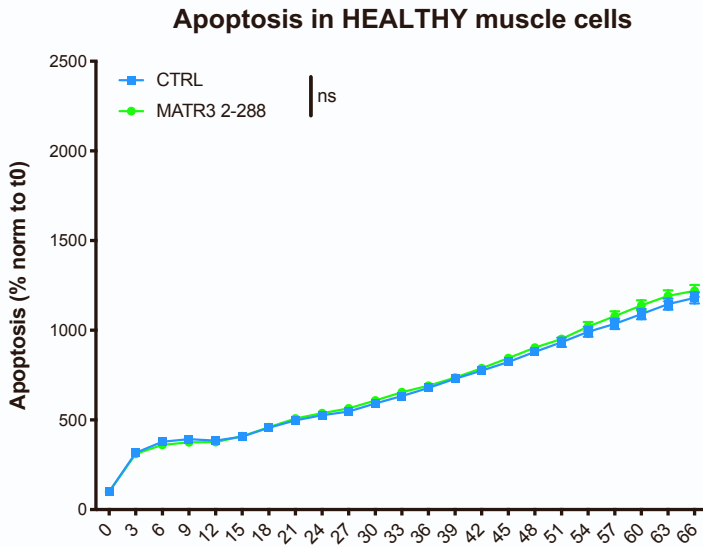**B**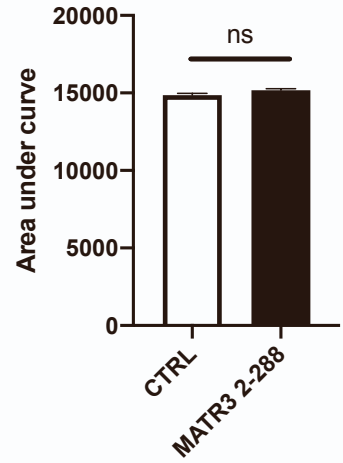

**Fig. S10. MATR3<sub>2-288</sub> does not affect cell viability of healthy primary muscle cells.** (Related to Figure 5). **A.** Live-cell, real-time, caspase 3/7 apoptotic assays on healthy primary muscle cells transduced with control (CTRL) or MATR3<sub>2-288</sub> lentiviruses. Live-cell imaging was performed by IncuCyte S3 Imager system and quantified using the IncuCyte software. Data are reported as percentage (%) of green-fluorescent apoptotic cells normalized to time 0 (Two-Way ANOVA, n=3). **B.** Quantification of the area under the curve in A (unpaired Student's t test).

**Table S2. List of primers used for cloning**  
 Related to Figures 1-5.

| <b>Target gene</b>      | <b>Sequence of Fw primer</b>                         | <b>Sequence of Rv primer</b>                         |
|-------------------------|------------------------------------------------------|------------------------------------------------------|
| FLAG MATR3 2-288        | CATGGACTCTTACCGAAGTAATATCCCCATCTGTGCTCT              | AGAGCACAGATGGGGATATTACTTCGGTAAGAGTCCATG              |
| FLAG MATR3 2-322        | CGTCGATGCCAGCTTCTTTAAGAAATCTACCCAGAATGG              | CCATTCTGGGTAGATTTCTTAAAGAAGCTGGCATCGACG              |
| FLAG MATR3 2-798        | GACTATGTGATACCTTAAACAGGGTTTTACTGTAAGCTG              | CAGCTTACAGTAAAACCCTGTTTAAAGGTATCACATAGTC             |
| FLAG MATR3 289-end      | AAAGGATCCTATCCCCATCTGTGCTCTATATGTG                   | AAACTCGAGTTAAGTTTCCTTCTTCTG                          |
| DUX4 full-length (attB) | GGGGACAAGTTTGTACAAAAAAGCAGGCTCCGCCCTCCCGACACCCTCGGAC | GGGGACCACTTTGTACAA GAAAGCTGGGTCTAAAGCTCCTCCAGCAGAGCC |
| DUX4 dbd (attB)         | GGGGACAAGTTTGTACAAAAAAGCAGGCTCCGCCCTCCCGACACCCTCGGAC | GGGGACCACTTTGTACAAGAAAGCTGGGTCTAGACCTGCGCGGGCGCCC    |

**Table S3. List of siRNA**

Related to Figures 1-3.

| <b>Target</b> | <b>Species</b> | <b>Description</b>                  | <b>Sequence/Catalogue number</b> |
|---------------|----------------|-------------------------------------|----------------------------------|
| MATR3         | Human          | ON-TARGETplus SMARTpool - Dharmacon | FE5L017382000005                 |
| ILF2          | Human          | ON-TARGETplus SMARTpool - Dharmacon | FE5L017599000005                 |
| PRKDC         | Human          | ON-TARGETplus SMARTpool - Dharmacon | FE5L005030000005                 |
| RUVBL1        | Human          | ON-TARGETplus SMARTpool - Dharmacon | FE5L008312000005                 |
| C1QBP         | Human          | ON-TARGETplus SMARTpool - Dharmacon | FE5L011225010005                 |
| CDC23         | Human          | ON-TARGETplus SMARTpool - Dharmacon | FE5L009523000005                 |
| CDC27         | Human          | ON-TARGETplus SMARTpool - Dharmacon | FE5L003229000005                 |
| SMARCC2       | Human          | ON-TARGETplus SMARTpool - Dharmacon | FE5L008977000005                 |
| ANAPC7        | Human          | ON-TARGETplus SMARTpool - Dharmacon | FE5L021035000005                 |
| SLC25A5       | Human          | ON-TARGETplus SMARTpool - Dharmacon | FE5L007486020005                 |
| DUX4          | Human          | Stealth siRNA                       | CCGAGCCTTTGAGAAGGATCGCTTT        |

**Table S4. List of primers used for RT-qPCR**

Related to Figures 1, 2 and 5.

| <b>Target gene</b>               | <b>Sequence of Fw primer</b> | <b>Sequence of Rv primer</b>      |
|----------------------------------|------------------------------|-----------------------------------|
| <i>GAPDH</i>                     | TCAAGAAGGTGGTGAAGCAGG        | ACCAGGAAATGAGCTTGACAAA            |
| <i>MATR3</i>                     | ATCAATGGAGCAAGTCACAGTC       | TGCAACATGAATGGATCACCC             |
| <i>MATR3 2-288</i>               | TACACGGGAGCCACCATACA         | CAGGACCACGTCCCATTCTC              |
| <i>ILF2</i>                      | CTCAGACTCTCGTCCGAATCC        | CAGAAGCAAGATAGCTGGCATC            |
| <i>PRKDC</i>                     | GAGAAGGCGGCTTACCTGAG         | CGAAGGCCCGCTTTAAGAGA              |
| <i>RUVBL1</i>                    | GGCATGTGGCGTCATAGTAGA        | CACGGAGTTAGCTCTGTGACT             |
| <i>C1QBP</i>                     | CGTGTGCTGGGCTCCTC            | AAAGCTTTGTCTCCGTCGGT              |
| <i>CDC23</i>                     | CTGCGAGTACCTCCATGGTC         | AGAGAGAAAGCCAACTCCGC              |
| <i>CDC27</i>                     | TGCTGACGTGTTTCTTGTC          | TTGCACTGCCTTTCATTCTG              |
| <i>SMARCC2</i>                   | CCGTGACCCAGTTCGACAAC         | CGGCAGTTTAGTGAGCGGT               |
| <i>ANAPC7</i>                    | GCTTTTCGAGTCAGTGCTGC         | GGGAGAATAACTCAGGGTTG              |
| <i>SLC25A5</i>                   | TTGATTTTGCCCGTACCCGT         | GGATCCGGAAGCATTCCCTT              |
| <i>DUX4</i><br>(overexpressed)   | GCGCAACCTCTCCTAGAAAC         | AGCAGAGCCCGGTATTCTTC              |
| <i>DUX4</i><br>(endogenous)      | CCCAGGTACCAGCAGACC           | TCCAGGAGATGTA ACTCTAATCCA         |
| <i>DUX4 dual</i><br>(endogenous) | CTTCCGTGAAATTCTGGCTGAATG     | TTTTTTTTTTTTTTTTTCTATAGGATCCACAGG |
| <i>MBD3L2</i>                    | GCGTTCACCTCTTTTCCAAG         | GCCATGTGGATTTCTCGTTT              |
| <i>RFPL2</i>                     | CCCACATCAAGGAACTGGAG         | TGTTGGCATCCAAGGTCATA              |
| <i>TRIM43</i>                    | ACCCATCACTGGACTGGTGT         | CACATCCTCAAAGAGCCTGA              |
| <i>TRIM48</i>                    | GGAGCTGTGTTTTGGTGACCT        | GTAGTTCATGCAGATGGGGCA             |
| <i>LEUTX</i>                     | GGGAAACTGGCTTCAAAGCTA        | TGATGGCCGTGTCTGCATT               |
| <i>ZSCAN4</i>                    | TGGAAATCAAGTGGCAAAAA         | CTGCATGTGGACGTGGAC                |
| <i>DYSTROPHIN</i>                | AGCAAGAGCACACAATTTGG         | CCCTGTTCGTCCCGTATCA               |

**Table S6. Human muscle cells information.**  
 Related to Figures 2, 3 and 5.

| Sample ID | Demographics |     |                                 |                           | DNA Results: Deletion Size/Haplotype |     |      |                       |     |      |                        |     |      |                        |     |      | Diagnostic Status and muscle sample |            |                 |                    |
|-----------|--------------|-----|---------------------------------|---------------------------|--------------------------------------|-----|------|-----------------------|-----|------|------------------------|-----|------|------------------------|-----|------|-------------------------------------|------------|-----------------|--------------------|
|           | Subject ID#  | Sex | Age(s) at Time of Collection(s) | # of Pre-served 4qA Units | Allele 4 <sub>1</sub>                |     |      | Allele 4 <sub>2</sub> |     |      | Allele 10 <sub>1</sub> |     |      | Allele 10 <sub>2</sub> |     |      | FSHD1                               | Unaffected | Muscle biopsied | Cultures: Myoblast |
|           |              |     |                                 |                           | Del Size (Kb)                        | A/B | SSLP | Del Size (Kb)         | A/B | SSLP | Del Size (Kb)          | A/B | SSLP | Del Size (Kb)          | A/B | SSLP |                                     |            |                 |                    |
| T2082     | 2082         | F   | 46                              | 7                         | 27                                   | A   | 161  | 80                    | A   | 163  | 60                     | A   | 166  | 250                    | A   | 166  | X                                   |            | QUAD            | X                  |
| T2349     | 2349         | F   | 29                              | 2                         | 12                                   | A   | 161  | 69                    | B   | 163  | 28                     | A   | 166  | 43                     | A   | 166  | X                                   |            | QUAD            | X                  |
| T230      | 2401         | M   | 58                              | 12                        | 42                                   | A   | 161  | 74                    | B   | 168  | 34                     | A   | 166  | 50                     | A   | 166  |                                     | X          | QUAD            | X                  |
| T135      | 2081         | F   | 42                              | 18                        | 65                                   | B   | 163  | 250                   | A   | 161  | 95                     | A   | 166  | 100                    | A   | 166  |                                     | X          | QUAD            | X                  |
| T216      | 2316         | M   | 34                              | 6                         | 24                                   | A   | 161  | 36H2                  | A   | 168  | 56                     | A   | 166  | 82(10/4)               | A   | 176  | X                                   |            | QUAD            | X                  |
| T188      | 2061         | F   | 54                              | 8                         | 30                                   | A   | 161  | 110                   | B   | 168  | 65                     | A   | 166  | 95                     | A   | 166  | X                                   |            | QUAD            | X                  |
